# Supplementary material
Source: publisher site journal article supplement (https://www.dovepress.com/get_supplementary_file.php?f=383059.docx)
Supplement: Supplementary file 1 [file get_supplementary_file.php]

Survey to Compare the Knowledge, Attitude and Practice About Blood Donation Among People in The Kingdom of Saudi Arabia, Albania and Turkey

<https://docs.google.com/forms/d/e/1FAIpQLSeZzY85s4UzCEzZY-o1DbtXERh_xl_ADcy8ayAMK8aHwraXFQ/viewform?usp=sf_link>

English form

| Section 1 | | | | | | | | | | | | | | | | | | | | | | | | |
| --- | --- | --- | --- | --- | --- | --- | --- | --- | --- | --- | --- | --- | --- | --- | --- | --- | --- | --- | --- | --- | --- | --- | --- | --- |
| 1. Name | |  | | | | | | | | | | | | | | | | | | | | | | |
| 2. Country of residence | |  | | | | | | | | | | | | | | | | | | | | | | |
|  | | | | | | | | | | | | | | | | | | | | | | | | |
| Section 2 | | | | | | | | | | | | | | | | | | | | | | | | |
| 1.Age | | < 16 | | 16 - 24 | | | | | 25 - 40 | | | | | | | 1. – 59 | | | | | 60+ | | | |
| 2.Gender | | ( ) Male | | | | | | | | | | | ( ) Female | | | | | | | | | | | |
| 3.Education | | ( ) Primary school (1-5) | | | | | | | | | | | ( ) Secondary school (6-9) | | | | | | | | | | | |
| () High school (10-12) | | | | | | | | | | | () College / University | | | | | | | | | | | |
| 4.What is your blood group? | | 1. O+ 2. O- 3. A+ 4. A- 5. B+ 6. B- 7. AB+ 8 AB- 9. I don’t know | | | | | | | | | | | | | | | | | | | | | | |
|  | | | | | | | | | | | | | | | | | | | | | | | | |
| Section 3 | | | | | | | | | | | | | | | | | | | | | | | | |
| Instruction: please read each question and choose a response (✓) that best describes your situation | | | | | | | | | | | | | | | | | | | | | | | | |
| 1. Have you ever donated blood? | | | | | | ( ) yes | | | | | | | | ( ) no | | | | | | | | | | |
| 2. Have you ever received blood? | | | | | | ( ) yes | | | | | | | | ( ) no | | | | | | | | | | |
| 3. Has any of your relatives received blood? | | | | | | ( ) yes | | | | | | | | ( ) no | | | | | | | | | | |
| 4. What is the frequency of your blood donation? | | ( ) Never donated | | | | | | | | | | | | ( ) Every two or three years | | | | | | | | | | |
| ( ) Once a year | | | | | | | | | | | | ( ) Regularly 2-3 times a year | | | | | | | | | | |
| 5. What was the reason that you donated? (you can tick more than one option) | | | | | | | | | | | | | | | | | | | | | | | | |
|  | I want to help others in need / save lives. | | | | | | | | | | | | | | | | | | | | | | | |
|  | I have a rare blood type which is in low supply | | | | | | | | | | | | | | | | | | | | | | | |
|  | I donated for my family members | | | | | | | | | | | | | | | | | | | | | | | |
|  | My family/friends donate and encouraged me to contribute. | | | | | | | | | | | | | | | | | | | | | | | |
|  | Financial benefits | | | | | | | | | | | | | | | | | | | | | | | |
|  | Other (please specify) | | | | | | | | | | | | | | | | | | | | | | | |
|  | | | | | | | | | | | | | | | | | | | | | | | | |
| 6. What is the reason that you have never donated blood? (you can tick more than one option) | | | | | | | | | | | | | | | | | | | | | | | | |
|  | I have never thought of it | | | | | | | | | | | | | | | | | | | | | | | |
|  | Nobody asked for | | | | | | | | | | | | | | | | | | | | | | | |
|  | Fear of anemia | | | | | | | | | | | | | | | | | | | | | | | |
|  | Objection from family | | | | | | | | | | | | | | | | | | | | | | | |
|  | Fear of sight of blood | | | | | | | | | | | | | | | | | | | | | | | |
|  | Fear of injection/needle | | | | | | | | | | | | | | | | | | | | | | | |
|  | Fear of misuse or abuse of the donated blood | | | | | | | | | | | | | | | | | | | | | | | |
|  | Medical reasons (anemia, heart diseases, underweight, blood infection, cancer, etc. ) | | | | | | | | | | | | | | | | | | | | | | | |
|  | Religious reasons | | | | | | | | | | | | | | | | | | | | | | | |
|  | I would rather not say | | | | | | | | | | | | | | | | | | | | | | | |
|  | No reason | | | | | | | | | | | | | | | | | | | | | | | |
|  | Other (specify) | | | | | | | | | | | | | | | | | | | | | | | |
|  | | | | | | | | | | | | | | | | | | | | | | | | |
| Section 4 | | | | | | | | | | | | | | | | | | | | | | | | |
| Instruction: Please read each question and choose a response (**✓**) that best describes your opinion | | | | | | | | | | | | | | | | | | | | | | | | |
| How much do you agree or disagree? | | | | | Strongly agree | | | Agree | | | | Undecided | | | | | Disagree | | | | | Strongly disagree | | | |
| Every healthy person should donate blood. | | | | | ( ) | | | ( ) | | | | ( ) | | | | | ( ) | | | | | ( ) | | | |
| Your donation encourages others to donate | | | | | ( ) | | | ( ) | | | | ( ) | | | | | ( ) | | | | | ( ) | | | |
| Blood donation has health benefits | | | | | ( ) | | | ( ) | | | | ( ) | | | | | ( ) | | | | | ( ) | | | |
| Blood donation can save lives | | | | | ( ) | | | ( ) | | | | ( ) | | | | | ( ) | | | | | ( ) | | | |
| I think blood can be sold | | | | | ( ) | | | ( ) | | | | ( ) | | | | | ( ) | | | | | ( ) | | | |
|  | | | | | | | | | | | | | | | | | | | | | | | |
| Section 5 | | | | | | | | | | | | | | | | | | | | | | | | |
| 1. What are some health benefits of blood donation? (you can tick more than one option) | | | | | | | | | | | | | | | | | | | | | | | |
|  | Free medical check-up | | | | | | | | | | | | | | | | | | | | | | |
|  | Happiness | | | | | | | | | | | | | | | | | | | | | | |
|  | Lowers cancer risk | | | | | | | | | | | | | | | | | | | | | | |
|  | Reduces risk for heart attack | | | | | | | | | | | | | | | | | | | | | | |
|  | Helps your liver stay healthy | | | | | | | | | | | | | | | | | | | | | | |
|  | Reduces harmful iron stores | | | | | | | | | | | | | | | | | | | | | | |
|  | No health benefits | | | | | | | | | | | | | | | | | | | | | | |
|  | Other (please specify) | | | | | | | | | | | | | | | | | | | | | | |
| 1. How often can a healthy person donate blood. | | Every month | Every 3 months | | | | Every 6 months | | | Once a year | | | | | Never | | | | According to situation | | | |
| Please tick one | | ( ) | | | ( ) | | | ( ) | | | | | | ( ) | | | | ( ) | | | | ( ) | |
| 1. Can smokers donate blood? | | | | | | | | | | | Yes | | | | | | | | | No | | | |
| 1. In order to donate blood, should the donor be fasting? | | | | | | | | | | | Yes | | | | | | | | | No | | | |
| 1. Can under 16-year olds donate blood? | | | | | | | | | | | Yes | | | | | | | | | No | | | |
| 1. Should people who receive blood pay for it? | | | | | | | | | | | Yes | | | | | | | | | No | | | |
| 1. Would you accept a monetary compensation for blood donation? | | | | | | | | | | | Yes | | | | | | | | | No | | | |
| 1. Can a person be infected by receiving blood transfusion? | | | | | | | | | | | Yes | | | | | | | | | No | | | |
| 1. Can something harmful happen to a blood donor during or after blood donation? | | | | | | | | | | | Yes | | | | | | | | | No | | | |
| 1. Would you encourage relatives/ friends to donate? | | | | | | | | | | | Yes | | | | | | | | | No | | | |
| 1. Do you think blood donation is the duty of citizens? | | | | | | | | | | | Yes | | | | | | | | | No | | | |
| 1. Will you donate if called upon or reminded to do so? | | | | | | | | | | | Yes | | | | | | | | | No | | | |
| 1. Will you donate blood to an unknown person if you were asked? | | | | | | | | | | | Yes | | | | | | | | | No | | | |
| 1. Do you think you are fit to donate? | | | | | | | | | | | Yes | | | | | | | | | No | | | |

Arabic Form

| القسم الأول | | | | | | | | | | | | | | | | | | | | | |
| --- | --- | --- | --- | --- | --- | --- | --- | --- | --- | --- | --- | --- | --- | --- | --- | --- | --- | --- | --- | --- | --- |
|  | | | | | | | | | | | | | | | | | 1. الاسم | | | | |
|  | | | | | | | | | | | | | | | | | 2. بلد المعيشة | | | | |
|  | | | | | | | | | | | | | | | | | 3. المهنة | | | | |
|  | | | | | | | | | | | | | | | | | | | | | |
| القسم الثاني | | | | | | | | | | | | | | | | | | | | | |
|  | | | | | | | | | | | | | | | | | 1. العمر | | | | |
| ( ) أنثى | | | | | | | | ( ) ذكر | | | | | | | | | 2. الجنس | | | | |
| ( ) المرحلة المتوسطة | | | | | | | | ( ) المرحلة الابتدائية | | | | | | | | | 3. التعليم | | | | |
| ( ) المرحلة الجامعية | | | | | | | | ( ) المرحلة الثانوية | | | | | | | | |
| 1. O+ 2. O- 3. A+ 4. A- 5. B+ 6. B- 7. AB+ 8. AB- 9. لا أعلم | | | | | | | | | | | | | | | | | 4. فصيلة الدم | | | | |
|  | | | | | | | | | | | | | | | | | | | | | |
| القسم الثالث | | | | | | | | | | | | | | | | | | | | | |
| ملاحظة: الرجاء قراءة كل سؤال ووضع علامة (✓) أمام الخيار الأنسب | | | | | | | | | | | | | | | | | | | | | |
| ( ) لا | | | | | | ( ) نعم | | | | | | | 1. هل تبرعت بالدم من قبل؟ | | | | | | | | |
| ( ) لا | | | | | | ( ) نعم | | | | | | | 2. هل تلقيتَ نقل دم من قبل؟ | | | | | | | | |
| ( ) لا | | | | | | ( ) نعم | | | | | | | 3. هل تلقى أيٌّ من أقاربك نقلَ دم من قبل؟ | | | | | | | | |
| ( ) كل عامين أو ثلاثة | | | | | | ( ) لم أتبرع أبدًا | | | | | | | | | | | | 4. ما هي عدد المرات التي تتبرع بها بالدم؟ | | | |
| ( ) مرتان أو ثلاث بشكل منتظم كل عام | | | | | | ( ) مرة في العام | | | | | | | | | | | |
| 5. ما هو السبب الذي تبرعت بالدم من أجله؟ (يمكنك اختيار أكثر من خيار واحد) | | | | | | | | | | | | | | | | | | | | | |
| الرغبة بمساعدة وإنقاذ المحتاجين | | | | | | | | | | | | | | | | | | | | |  |
| لقد تبرعت لأفراد عائلتي | | | | | | | | | | | | | | | | | | | | |  |
| لدي فصيلة دم نادرة وغير متوفرة بشكل كافٍ | | | | | | | | | | | | | | | | | | | | |  |
| عائلتي/أصدقائي يتبرعون بالدم وشجعوني على المشاركة | | | | | | | | | | | | | | | | | | | | |  |
| فوائد مادية | | | | | | | | | | | | | | | | | | | | |  |
| أخرى (يرجى التحديد) | | | | | | | | | | | | | | | | | | | | |  |
| 6. ما هو سبب عدم تبرعك بالدم أبدًا؟ (يمكنك اختيار أكثر من خيار واحد) | | | | | | | | | | | | | | | | | | | | | |
| لم أفكر بالموضوع من قبل | | | | | | | | | | | | | | | | | | | |  | |
| لم يطلب مني أحد | | | | | | | | | | | | | | | | | | | |  | |
| الخوف من مرض فقر الدم | | | | | | | | | | | | | | | | | | | |  | |
| معارضة الأهل | | | | | | | | | | | | | | | | | | | |  | |
| الخوف من رؤية الدم | | | | | | | | | | | | | | | | | | | |  | |
| الخوف من الإبرة | | | | | | | | | | | | | | | | | | | |  | |
| الخوف من إساءة استخدام الدم | | | | | | | | | | | | | | | | | | | |  | |
| أسباب طبية (فقر دم، أمراض قلبية، نقص وزن، أمراض مُعْدِيَة، سرطان، إلخ) | | | | | | | | | | | | | | | | | | | |  | |
| أسباب دينية | | | | | | | | | | | | | | | | | | | |  | |
| أُفَضِّل عدم الإجابة | | | | | | | | | | | | | | | | | | | |  | |
| لا يوجد سبب | | | | | | | | | | | | | | | | | | | |  | |
| أخرى (يرجى التحديد) | | | | | | | | | | | | | | | | | | | |  | |
|  | | | | | | | | | | | | | | | | | | | | | |
| القسم الرابع | | | | | | | | | | | | | | | | | | | | | |
| ملاحظة: الرجاء قراءة كل سؤال ووضع علامة (✓) أمام الخيار الأنسب | | | | | | | | | | | | | | | | | | | | | |
| أعارض بشدة | | أعارض | | | محايد | | | | موافق | | | موافق بشدة | | | إلى أي حدٍّ توافق أو تعارض؟ | | | | | | |
| ( ) | | ( ) | | | ( ) | | | | ( ) | | | ( ) | | | كل شخص صحي عليه أن يتبرع بالدم | | | | | | |
| ( ) | | ( ) | | | ( ) | | | | ( ) | | | ( ) | | | تبرعك بالدم يشجع الآخرين على التبرع | | | | | | |
| ( ) | | ( ) | | | ( ) | | | | ( ) | | | ( ) | | | للتبرع بالدم فوائدُ صحيةٌ | | | | | | |
| ( ) | | ( ) | | | ( ) | | | | ( ) | | | ( ) | | | يمكن إنقاذ الأرواح بالتبرع بالدم بإذن الله | | | | | | |
| ( ) | | ( ) | | | ( ) | | | | ( ) | | | ( ) | | | هل يجوز بيع الدم | | | | | | |
|  | | | | | | | | | | | | | | | | | | | | | |
| القسم الخامس | | | | | | | | | | | | | | | | | | | | | |
| 1. ما الفوائد الصحية للتبرع بالدم؟ (يمكنك اختيار أكثر من خيار واحد) | | | | | | | | | | | | | | | | | | | | | |
| فحوص طبية مجانية | | | | | | | | | | | | | | | | | | | |  | |
| السعادة | | | | | | | | | | | | | | | | | | | |  | |
| خفض نسبة الإصابة بالسرطان | | | | | | | | | | | | | | | | | | | |  | |
| خفض نسبة الإصابة بنوبات القلب | | | | | | | | | | | | | | | | | | | |  | |
| يساعد على الحفاظ على صحة الكبد | | | | | | | | | | | | | | | | | | | |  | |
| خفض تخزين الحديد الزائد الضار | | | | | | | | | | | | | | | | | | | |  | |
| لا توجد فوائد صحية | | | | | | | | | | | | | | | | | | | |  | |
| أخرى (يرجى التحديد) | | | | | | | | | | | | | | | | | | | |  | |
| وفقًا للحالة | لا يمكن أبدًا | | | ( ) مرة في العام | | | ( ) كل ستة أشهر | | | | ( ) كل ثلاثة أشهر | | | ( ) كل شهرين | | ( ) كل شهر | | | 2. كم مرةً بإمكان الشخص الصحي التبرع بالدم | | |
| لا | | | نعم | | | | | | | 3. هل يمكن للمدخنين التبرع بالدم؟ | | | | | | | | | | | |
| لا | | | نعم | | | | | | | 4. عند التبرع بالدم، هل على المتبرع أن يكون صائمًا (ممتنعًا عن الأكل والشرب باستثناء الماء لمدة 8 ساعات على الأقل)؟ | | | | | | | | | | | |
| لا | | | نعم | | | | | | | 5. هل بإمكان من هم دون الـ 16 سنة التبرع بالدم؟ | | | | | | | | | | | |
| لا | | | نعم | | | | | | | 6. هل على المتلقين للدم الدفع مقابِلَه؟ | | | | | | | | | | | |
| لا | | | نعم | | | | | | | 7. هل ستقبل بتعويض مادي مقابل تبرعك بالدم؟ | | | | | | | | | | | |
| لا | | | نعم | | | | | | | 8. هل من الممكن أن يُصَاب المتلقي للدم بالعدوى؟ | | | | | | | | | | | |
| لا | | | نعم | | | | | | | 9. هل من الممكن أن يُصاب المتبرع بضرر أثناء أو بعد التبرع بالدم؟ | | | | | | | | | | | |
| لا | | | نعم | | | | | | | 10. هل ستشجع أقاربك/أصدقاءك على التبرع بالدم؟ | | | | | | | | | | | |
| لا | | | نعم | | | | | | | 11. هل تؤمن أن التبرع بالدم هو مسؤولية المواطنين؟ | | | | | | | | | | | |
| لا | | | نعم | | | | | | | 12. هل ستتبرع بالدم لو طُلِب منك أو ذُكِّرت بذلك؟ | | | | | | | | | | | |
| لا | | | نعم | | | | | | | 13. هل ستتبرع بالدم لشخص غير معروف لو طُلِب منك؟ | | | | | | | | | | | |
| لا | | | نعم | | | | | | | 14. هل تعتقد بأنك لائق للتبرع بالدم؟ | | | | | | | | | | | |

دراسة لمقارنة المعرفة والسلوك والممارسة فيما يخص التبرع بالدم بين سكان السعودية وألبانيا وتركيا

Albanian form

| Pjesa 1 | | | | | | | | | | | | | | | | | |
| --- | --- | --- | --- | --- | --- | --- | --- | --- | --- | --- | --- | --- | --- | --- | --- | --- | --- |
| 1. Emri, Mbiemri | |  | | | | | | | | | | | | | | | |
| 2. Vendi ku jetoni | |  | | | | | | | | | | | | | | | |
| 3. Profesioni | |  | | | | | | | | | | | | | | | |
|  | | | | | | | | | | | | | | | | | |
| Pjesa 2 | | | | | | | | | | | | | | | | | |
| 1.Mosha | | < 16 | | 16 - 24 | | | 25 - 40 | | | | 1. – 59 | | | | 60+ | | |
| 2.Gjinia | | ( ) Mashkull | | | | | | | ( ) Femër | | | | | | | | |
| 3.Arsimi | | ( ) Fillor (1-5) | | | | | | | ( ) 9-vjeçar (6-9) | | | | | | | | |
| () I Mesëm (10-12) | | | | | | | () I Lartë | | | | | | | | |
| 4.Cili është grupi juaj i gjakut | | 1.O+ 2.O- 3. A+ 4. A- 5. B+ 6. B- 7. AB+ 8 AB- 9. Nuk e di | | | | | | | | | | | | | | | |
|  | | | | | | | | | | | | | | | | | |
| Pjesa 3 | | | | | | | | | | | | | | | | | |
| Udhëzim: Ju lutem lexoni çdo pyetje dhe shenoni me (✓) përgjigjet tuaja | | | | | | | | | | | | | | | | | |
| 1. A keni dhuruar ndonjëherë gjak? | | | | | ( ) Po | | | | | ( ) Jo | | | | | | | |
| 2. A keni marrë ndonjëherë gjak? | | | | | ( ) Po | | | | | ( ) Jo | | | | | | | |
| 3. A ka dhuruar ndonjë i afërm i juaji gjak? | | | | | ( ) Po | | | | | ( ) Jo | | | | | | | |
| 4. Sa shpesh keni dhuruar gjak? | | ( ) Asnjëherë | | | | | | | | ( ) Çdo 2 apo 3 vjet. | | | | | | | |
| ( ) Njëherë në vit | | | | | | | | ( ) Regullisht 2-3 herë në vit | | | | | | | |
| 5. Çfarë ju ka shtyrë të dhuroni gjak? (mund të zgjidhni më tepër se 1 arsye) | | | | | | | | | | | | | | | | | |
|  | Dua të ndihmoj të tjerët dhe të shpëtoj jetë | | | | | | | | | | | | | | | | |
|  | Kam dhuruar për një nga pjestarët e familjes time. | | | | | | | | | | | | | | | | |
|  | Unë kam një grup të rallë gjaku | | | | | | | | | | | | | | | | |
|  | Familja dhe miqtë e mi më kanë nxitur të dhuroj | | | | | | | | | | | | | | | | |
|  | Për përfitime materiale/financiare | | | | | | | | | | | | | | | | |
|  | Arsye të tjera (specifikoni) | | | | | | | | | | | | | | | | |
| 6. Çfarë ju ka penguar nga dhurimi i gjakut? (mund të zgjidhni më tepër se 1 arsye) | | | | | | | | | | | | | | | | | |
|  | Nuk e kam menduar ndonjëherë | | | | | | | | | | | | | | | | |
|  | Nuk më ka kërkuar kush | | | | | | | | | | | | | | | | |
|  | Kam frikë nga anemia | | | | | | | | | | | | | | | | |
|  | Kam pasur kundërshtime nga familja | | | | | | | | | | | | | | | | |
|  | Kam frikë nga gjaku (më zë gjaku) | | | | | | | | | | | | | | | | |
|  | Kam frikë nga gjilpërat dhe injeksionet | | | | | | | | | | | | | | | | |
|  | Kam frikë nga abuzime të mundshme që mund të bëhen me gjakun e dhuruar | | | | | | | | | | | | | | | | |
|  | Kam arsye mjeksore (anemi, sëmundje zemre, nënpeshë, infeksion gjaku, kancer, etj. ) | | | | | | | | | | | | | | | | |
|  | Kam frikë se marr ndonjë infeksion | | | | | | | | | | | | | | | | |
|  | Arsye fetare | | | | | | | | | | | | | | | | |
|  | Preferoj të mos e them | | | | | | | | | | | | | | | | |
|  | Nuk kam ndonjë arsye | | | | | | | | | | | | | | | | |
|  | Arsye të tjera (specifikoni) | | | | | | | | | | | | | | | | |
|  | | | | | | | | | | | | | | | | | |
| Pjesa 4 | | | | | | | | | | | | | | | | | |
| Udhëzim: Ju lutem lexoni çdo pyetje dhe shenoni me (✓) përgjigjet e tuaja | | | | | | | | | | | | | | | | | |
| Sa jeni dakort….. | | | Shumë dakort | | | Dakort | | I pavendosur | | | | Kundër | | | | Shumë kundër | | |
| Çdo person i shëndetshëm duhet të dhurojë gjak. | | | ( ) | | | ( ) | | ( ) | | | | ( ) | | | | ( ) | | |
| Dhurimi yt do të nxisë të tjerët të dhurojnë | | | ( ) | | | ( ) | | ( ) | | | | ( ) | | | | ( ) | | |
| Dhurimi i gjakut ka përfitime shëndetsore | | | ( ) | | | ( ) | | ( ) | | | | ( ) | | | | ( ) | | |
| Dhurimi i gjakut mund të shpëtojë jetë. | | | ( ) | | | ( ) | | ( ) | | | | ( ) | | | | ( ) | | |
| Gjaku mund të shitet | | | ( ) | | | ( ) | | ( ) | | | | ( ) | | | | ( ) | | |
|  | | | | | | | | | | | | | | | | |
| Pjesa 5 | | | | | | | | | | | | | | | | | |
| 1. Cilat mendoni se janë disa nga përfitimet shëndetsore të dhurimit të gjakut. (mund të zgjidhni më tepër se 1 arsye) | | | | | | | | | | | | | | | | |
|  | Kontroll mjeksor falas | | | | | | | | | | | | | | | |
|  | Lumturi shpirtërore | | | | | | | | | | | | | | | |
|  | Rezik i reduktuar për kancer | | | | | | | | | | | | | | | |
|  | Rrezik i reduktuar për sëmundje zemre | | | | | | | | | | | | | | | |
|  | Ndihmon të kesh një mëlçi të shëndetshme | | | | | | | | | | | | | | | |
|  | Pakëson rezervat e dëmshme të hekurit | | | | | | | | | | | | | | | |
|  | Nuk ka ndonjë përfitim shëndetsor | | | | | | | | | | | | | | | |
|  | Arsye të tjera (specifikoni) | | | | | | | | | | | | | | | |
| 1. Sa shpesh mundet një person i shëndetshëm të dhurojë gjak | | Çdo muaj | Çdo 3 muaj | | | Çdo 6 muaj | | | | Një herë në vit. | | | Asnjëherë | | | Sipas situats |
| Ju lutem zgjidhni një përgjigje | | ( ) | ( ) | | | ( ) | | | | ( ) | | | ( ) | | | ( ) |
| 1. A mundet një duhanpirës të dhurojë gjak? | | | | | | | | | Po | | | | | Jo | | |
| 1. A duhet te jetë esëll dhuruesi në momentin e dhurimit? | | | | | | | | | Po | | | | | Jo | | |
| 1. A mundet dikush që është nën 16 vjeç të dhurojë gjak? | | | | | | | | | Po | | | | | Jo | | |
| 1. A duhet që të paguajnë ata që marin gjak? | | | | | | | | | Po | | | | | Jo | | |
| 1. A do të pranonit një vlerë monetare kundrejt dhurimit tuaj? | | | | | | | | | Po | | | | | Jo | | |
| 1. A mundet dikush të marë ndonjë infeksion gjatë marjes së gjakut? | | | | | | | | | Po | | | | | Jo | | |
| 1. A mund t’i ndodhë diçka e keqe një dhuruesi gjatë apo pas dhurimit? | | | | | | | | | Po | | | | | Jo | | |
| 1. A do t’i nxisnit të afërmit dhe miqtë të dhurojnë gjak? | | | | | | | | | Po | | | | | Jo | | |
| 1. A mendoni që dhurimi i gjakut është një detyrë qytetare? | | | | | | | | | Po | | | | | Jo | | |
| 1. A do të dhuronit gjak nëse do t’ju kërkohej në të ardhmen? | | | | | | | | | Po | | | | | Jo | | |
| 1. A do të dhuronit gjak për një të panjohur? | | | | | | | | | Po | | | | | Jo | | |
| 1. A mendoni që jeni i shëndetshëm për të dhuruar gjak? | | | | | | | | | Po | | | | | Jo | | |

Turkish Version

| 1. Bölüm | | | | | | | | | | | | | | | | | | |
| --- | --- | --- | --- | --- | --- | --- | --- | --- | --- | --- | --- | --- | --- | --- | --- | --- | --- | --- |
| 1.Adı Soyadı | |  | | | | | | | | | | | | | | | | |
| 2. Hangi ülkede yaşıyorsunuz | |  | | | | | | | | | | | | | | | | |
| 3.Meslek | |  | | | | | | | | | | | | | | | | |
|  | | | | | | | | | | | | | | | | | | |
| 1. Bölüm | | | | | | | | | | | | | | | | | | |
| 1.Yaş | | < 16 | | | 16 - 24 | | 25 - 40 | | | | | 41 - 59 | | | | 60 + | | |
| . Cinsiyet | | ( ) Bay | | | | | | | ( ) Bayan | | | | | | | | | |
| 3. Eğitim | | ( ) İlk okul (1-5) | | | | | | | ( ) Orta okul (6-9) | | | | | | | | | |
| ( ) Lise (10-12) | | | | | | | ( ) Üniversite | | | | | | | | | |
| 4. Kan grubunuz nedir? | | 1.O+ 2.O- 3. A+ 4. A- 5. B+ 6. B- 7. AB+ 8 AB- 9. Bilmiyorum | | | | | | | | | | | | | | | | |
|  | | | | | | | | | | | | | | | | | | |
| 1. Bölüm | | | | | | | | | | | | | | | | | | |
| Lütfen her soruyu okuyun ve durumunuzu en iyi tanımlayan yanıtı (✓) seçin | | | | | | | | | | | | | | | | | | |
| 1. Hiç kan bağışladınız mı? | | | | ( ) Evet | | | | | | | ( ) Hayır | | | | | | | |
| 2. Hiç kan aldınız mı? | | | | ( ) Evet | | | | | | | ( ) Hayır | | | | | | | |
| 3. Akrabalarınızdan herhangi birine kan verildi mi? | | | | ( ) Evet | | | | | | | ( ) Hayır | | | | | | | |
| 4. Kaç kere kan bağışladınız? | | ( ) Hiç bağışlamadım | | | | | | | | | ( ) Her 2-3 yılda | | | | | | | |
| ( ) Yılda 1 defa | | | | | | | | | ( ) Yılda 2-3 defa | | | | | | | |
| 5. Bağış yapmanın nedeni neydi? (birden fazla seçeneği işaretleyebilirsiniz) | | | | | | | | | | | | | | | | | | |
|  | İhtiyacı olanlara yardım etmek / hayat kurtarmak istiyorum. | | | | | | | | | | | | | | | | | |
|  | Aile üyelerime bağış yaptım | | | | | | | | | | | | | | | | | |
|  | Az miktarda bulunan ve nadir görülen bir kan grubum var. | | | | | | | | | | | | | | | | | |
|  | Ailem/arkadaşlarım bağışta bulunuyor ve katkıda bulunmam için beni cesaretlendirdiler. | | | | | | | | | | | | | | | | | |
|  | Para için | | | | | | | | | | | | | | | | | |
|  | Diğer (belirtiniz) | | | | | | | | | | | | | | | | | |
| 6. Hiç kan bağışlamamış olmanızın nedeni nedir? (birden fazla seçeneği işaretleyebilirsiniz) | | | | | | | | | | | | | | | | | | |
|  | Hiç düşünmedim | | | | | | | | | | | | | | | | | |
|  | Kimse istemedi | | | | | | | | | | | | | | | | | |
|  | Anemi korkusu | | | | | | | | | | | | | | | | | |
|  | Aileden itiraz | | | | | | | | | | | | | | | | | |
|  | Kan görme korkusu | | | | | | | | | | | | | | | | | |
|  | Enjeksiyon korkusu | | | | | | | | | | | | | | | | | |
|  | Bağışlanan kanın kötüye kullanılması veya kötüye kullanılması korkusu | | | | | | | | | | | | | | | | | |
|  | Tıbbi nedenler (anemi, kalp hastalıkları, zayıflık, kan enfeksiyonu, kanser vb.) | | | | | | | | | | | | | | | | | |
|  | Dini sebepler | | | | | | | | | | | | | | | | | |
|  | Söylememeyi tercih ederim | | | | | | | | | | | | | | | | | |
|  | Bir sebepi yok | | | | | | | | | | | | | | | | | |
|  | Diğer (belirtin) | | | | | | | | | | | | | | | | | |
|  | | | | | | | | | | | | | | | | | | |
| 1. Bölüm | | | | | | | | | | | | | | | | | | |
| Lütfen her soruyu okuyun ve durumunuzu en iyi tanımlayan yanıtı (✓) seçin | | | | | | | | | | | | | | | | | | |
| Ne kadar katılıyorsunuz veya katılmıyorsunuz? | | | Kesinlikle katılıyorum | | | Katılıyorum | | Kararsız | | | | | Katılmıyorum | | | | Kesinlikle katılmıyorum | |
| Sağlıklı her insan kan bağışında bulunmalıdır.. | | | ( ) | | | ( ) | | ( ) | | | | | ( ) | | | | ( ) | |
| Bağışınız başkalarını bağış yapmaya teşvik ediyor | | | ( ) | | | ( ) | | ( ) | | | | | ( ) | | | | ( ) | |
| Kan bağışı sağlık açısından faydalıdır | | | ( ) | | | ( ) | | ( ) | | | | | ( ) | | | | ( ) | |
| Kan bağışı hayat kurtarabilir | | | ( ) | | | ( ) | | ( ) | | | | | ( ) | | | | ( ) | |
| Kan satılmalı | | | ( ) | | | ( ) | | ( ) | | | | | ( ) | | | | ( ) | |
|  | | | | | | | | | | | | | | | | | |
| 1. Bölüm | | | | | | | | | | | | | | | | | | |
| 1. Kan bağışının bazı sağlık yararları nelerdir (birden fazla seçeneği işaretleyebilirsiniz) | | | | | | | | | | | | | | | | | |
|  | Ücretsiz tıbbi kontrol | | | | | | | | | | | | | | | | |
|  | Mutluluk | | | | | | | | | | | | | | | | |
|  | Düşük kanser riski | | | | | | | | | | | | | | | | |
|  | Daha az kalp krizi riski | | | | | | | | | | | | | | | | |
|  | Karaciğerinizin sağlıklı kalmasına yardımcı olun. | | | | | | | | | | | | | | | | |
|  | Zararlı demir depolarını azaltması | | | | | | | | | | | | | | | | |
|  | Sağlık yararı yok | | | | | | | | | | | | | | | | |
|  | Diğer (belirtin) | | | | | | | | | | | | | | | | |
| 1. Sağlıklı bir kişi ne sıklıkla kan bağışı yapabilir. | | Her ay | Her 3 ay | | | Her 6 ay | | | | | Yılda bir kez | | | Asla | | | Duruma göre |
| Lütfen birini işaretleyin | | ( ) | ( ) | | | ( ) | | | | | ( ) | | | ( ) | | | ( ) |
| 1. Sigara içenler kan bağışı yapabilir mi? | | | | | | | | | | Evet | | | | | Hayır | | |
| 1. Kan bağışı yapabilmek için vericinin aç karnına gerekir mi? | | | | | | | | | | Evet | | | | | Hayır | | |
| 1. 16 yaşından küçükler kan bağışı yapabilir mi? | | | | | | | | | | Evet | | | | | Hayır | | |
| 1. Kan alan insanlar bunun bedelini ödemeli mi? | | | | | | | | | | Evet | | | | | Hayır | | |
| 1. Kan bağışı için parasal bir tazminatı kabul eder misiniz? | | | | | | | | | | Evet | | | | | Hayır | | |
| 1. Kan nakli yapılarak bir kişi enfekte olabilir mi? | | | | | | | | | | Evet | | | | | Hayır | | |
| 1. Kan bağışı sırasında veya sonrasında kan vericisine zararlı bir şey olabilir mi? | | | | | | | | | | Evet | | | | | Hayır | | |
| 1. Akrabalarınızı / arkadaşlarınızı bağış yapmaya teşvik eder misiniz? | | | | | | | | | | Evet | | | | | Hayır | | |
| 1. Kan bağışının vatandaşların görevi olduğunu düşünüyor musunuz? | | | | | | | | | | Evet | | | | | Hayır | | |
| 1. Çağırılırsa veya hatırlatılırsa bağış yapacak mısınız? | | | | | | | | | | Evet | | | | | Hayır | | |
| 1. İstendiğinde tanimadiğin bir kişiye kan bağışlar mısın? | | | | | | | | | | Evet | | | | | Hayır | | |
| 1. Bağış yapmaya uygun olduğunuzu düşünüyor musunuz? | | | | | | | | | | Evet | | | | | Hayır | | |
